# Supplementary material for: Corneal Epithelial Removal with a Newly Designed Epithelial Brush
Source: Hindawi journal article supplement (doi:10.1155/2021/4668056), 2021-11-16

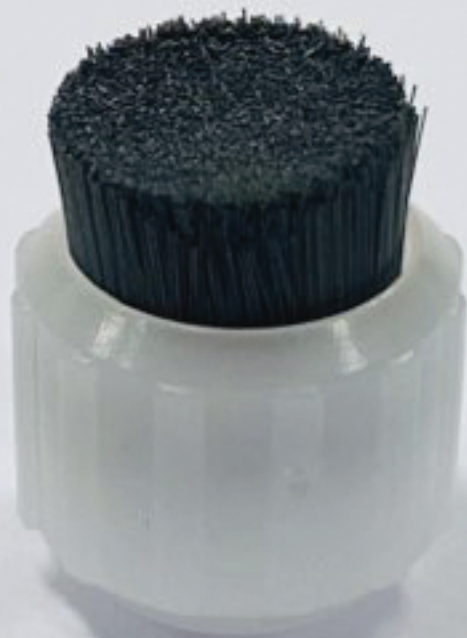

Supplement: f1 [file 4668056.f1.pdf]
